# Supplementary material for: Selective and competitive functions of the AAR and UPR pathways in stress-induced angiogenesis
Source: PubMed Central journal article supplement (PMC8547220; doi:10.1038/s41421-021-00332-8), 2021-10-26
Supplement: 41421_2021_332_MOESM1_ESM.pdf [file 41421_2021_332_MOESM1_ESM.pdf]

**Zhang et al., Selective and competitive functions of the AAR and UPR pathways in stress-induced angiogenesis**

**Supplementary Information, containing 11 Supplementary Figures, 5 Supplementary Tables and 6 Supplementary References.**

## Supplementary Figures

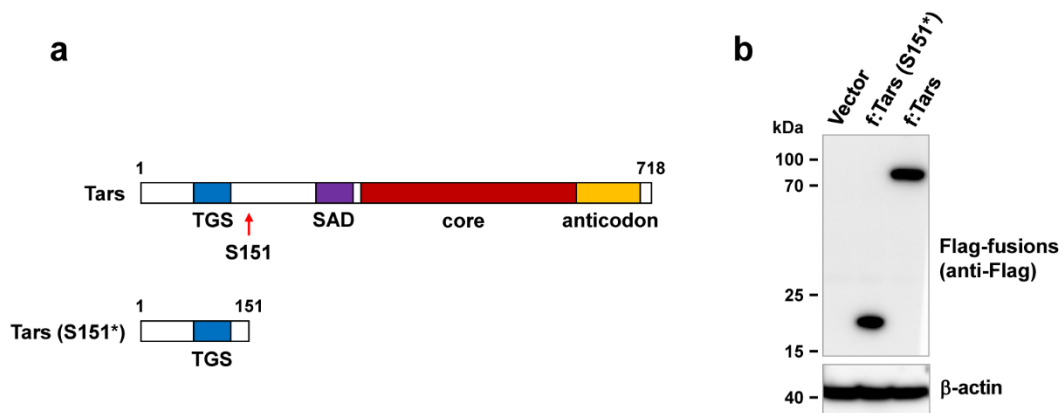

**Supplementary Fig. S1 The mutated *tars* gene can only encode a truncated protein.** **a** Domain architecture of the wild-type (WT) and mutant (S151\*) Tars proteins. **b** Ectopic expression and immunoblot analysis of *tars* WT and mutant proteins fused with Flag (f:) tags at the N-terminus. Full-length WT and mutant *tars* cDNAs were cloned from the WT and mutant embryos. The proteins were expression in NIH 3T3 cells, and  $\beta$ -actin was used as a loading control.

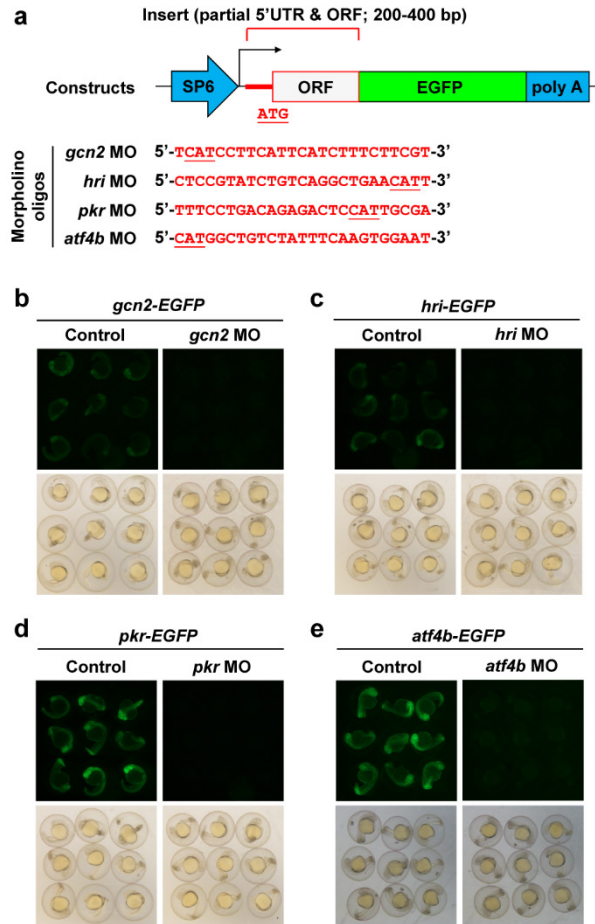

**Supplementary Fig. S2 Verification of the efficiency of the morpholinos that were designed for the first time and used in this study.** **a** Targeting and validation strategies and the sequences of the morpholino oligos (MOs), which are designed to inhibit protein translation. The partial 5'UTRs and ORFs of the target genes containing morpholino target sequences are fused in frame with EGFP followed by a polyA site. The start codon (ATG) in the targeted ORFs and its complementary sequence (CAT) in the morpholinos are underlined. Other morpholinos used in this study have been described previously and their sequences and references are listed in [Supplementary Table S5](#). **b–e** Fluorescence microscopy (*top*) and bright field images (*bottom*) of representative embryos injected with indicated EGFP-fusion mRNAs with or without morpholinos. Note that these morpholinos can significantly inhibit the expression of EGFP, indicative of an effective knockdown.

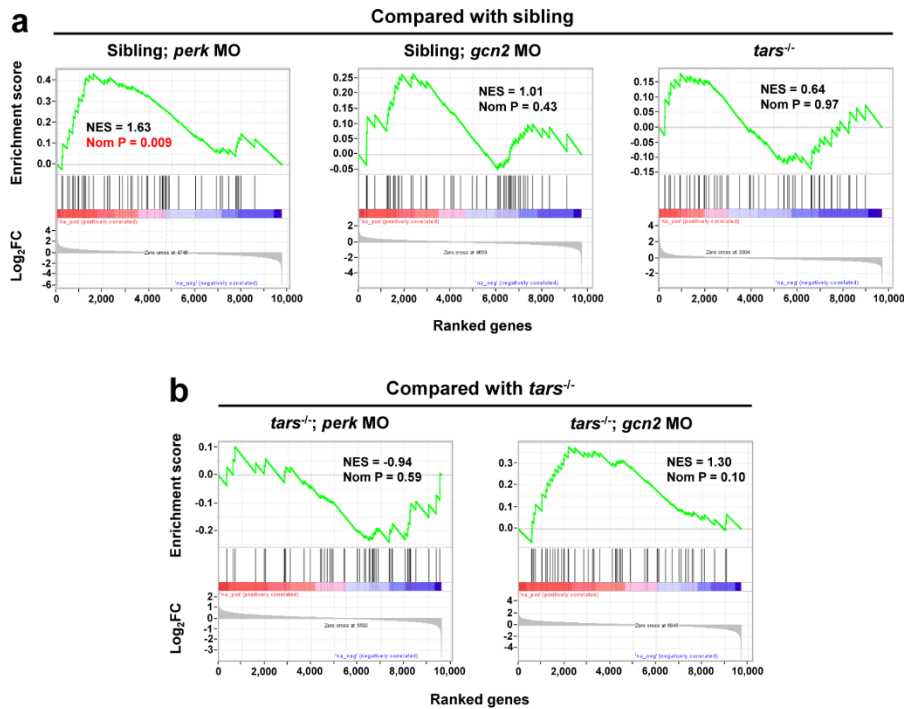

**Supplementary Fig. S3 Perk functions predominantly in normal development but is overwhelmed in *tars*<sup>-/-</sup> stress condition.** **a** Representative gene set enrichment analysis (GSEA) showing that knockdown of Perk in normal embryos (siblings) significantly activates RNA degradation-associated genes, as represented by the KEGG\_RNA\_DEGRADATION gene set (*left*). In contrast, knockdown of Gcn2 (*gcn2* MO) or knockout of Tars (*tars*<sup>-/-</sup>) shows no significant effect (*middle* and *right*). The statistical significance of the enrichment in the GSEA is assessed by the Nominal p-value (Nom P) and the significant one (Nom P < 0.05) is written in *red*. **b** Knockdown of Perk (*left*) or Gcn2 (*right*) in the *tars*<sup>-/-</sup> embryos cannot activate the RNA degradation-associated genes.

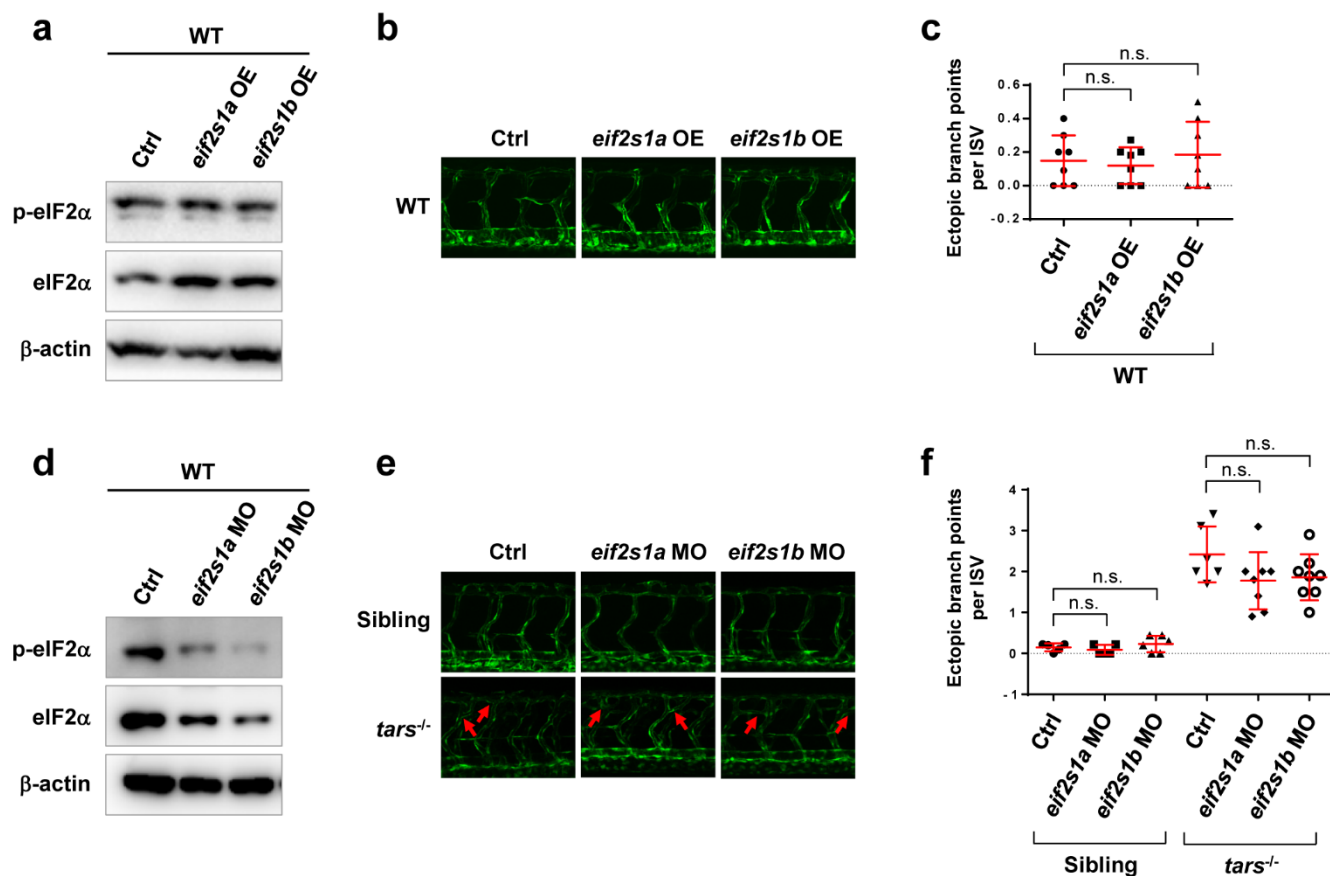

**Supplementary Fig. S4 Changes in total eIF2 $\alpha$  protein level show little effect on angiogenesis. a**

Immunoblot analysis of the eIF2 $\alpha$  overexpressing (OE) WT embryos that were injected with *eif2s1a* or *eif2s1b* mRNAs. Note that, while the total eIF2 $\alpha$  is increased, the phosphorylated eIF2 $\alpha$  (p-eIF2 $\alpha$ ) is not significantly affected. **b** Confocal microscopy imaging of EGFP-labelled blood vessels in the trunk of the eIF2 $\alpha$  OE embryos. **c** Quantification and statistical analysis of the ectopic branch points per intersomitic vessel (ISV) showing no significant difference between the control and eIF2 $\alpha$  OE embryos. **d** Immunoblot analysis validating the efficiencies of the *eif2s1a* and *eif2s1b* morpholinos (MOs) in the WT embryos. **e**, **f** Confocal microscopy imaging and statistical analysis of the angiogenic phenotypes of the control and MO-injected sibling and *tars*<sup>-/-</sup> embryos. Note that the decrease of total eIF2 $\alpha$  has no effect in the sibling embryos, and it very slightly, albeit not significantly, decreases the ectopic branch points in the *tars*<sup>-/-</sup> embryos.

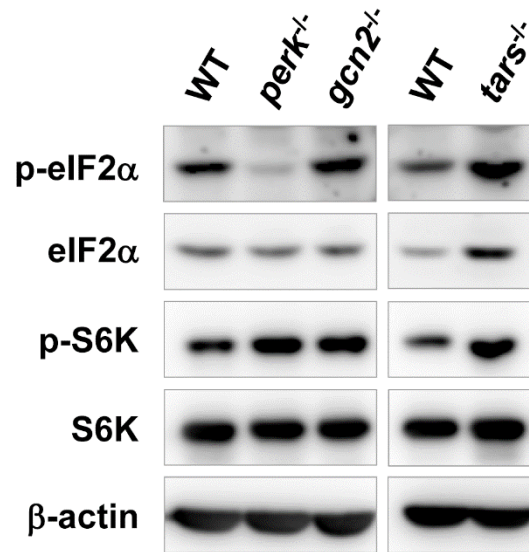

**Supplementary Fig. S5 Immunoblot analysis of eIF2 $\alpha$  phosphorylation in *perk*, *gcn2* and *tars* knockout zebrafish embryos.** Note that the eIF2 $\alpha$  phosphorylation (p-eIF2 $\alpha$ ) level is decreased in the *perk*<sup>-/-</sup>, increased in the *tars*<sup>-/-</sup>, and not changed in the *gcn2*<sup>-/-</sup> embryos. The embryos used in this experiment were all 3 dpf. Total eIF2 $\alpha$ , phosphorylated S6K (p-S6K) and total S6K were also analyzed.  $\beta$ -actin was used as loading control.

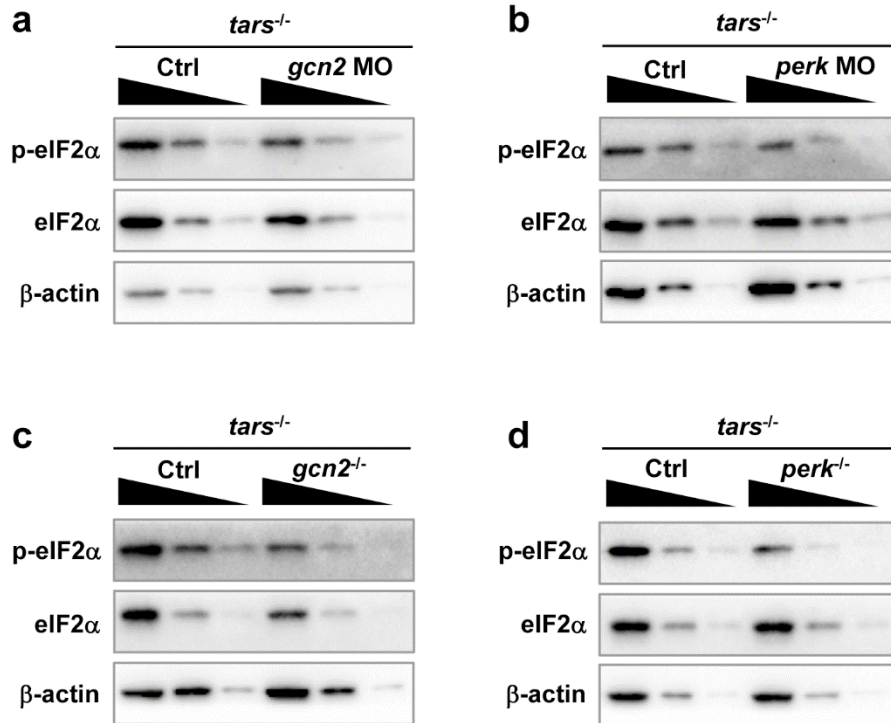

**Supplementary Fig. S6 Serial dilution immunoblot analysis showing that Gcn2- and Perk-knockdown/knockout in the *tars*<sup>-/-</sup> embryos reduce eIF2α phosphorylation to a comparable extent.**

**a, b** The *tars*<sup>-/-</sup> embryos were injected with *gcn2* or *perk* MOs to knock down Gcn2 or Perk, respectively.

**c, d** The *gcn2*<sup>-/-</sup> or *perk*<sup>-/-</sup> lines were crossed with *tars*<sup>+/-</sup> to obtain the double knockout embryos, which were compared with the *tars*<sup>-/-</sup> embryos. Each sample was loaded in 3-fold serial dilution to facilitate quantification, and β-actin was used as a loading control.

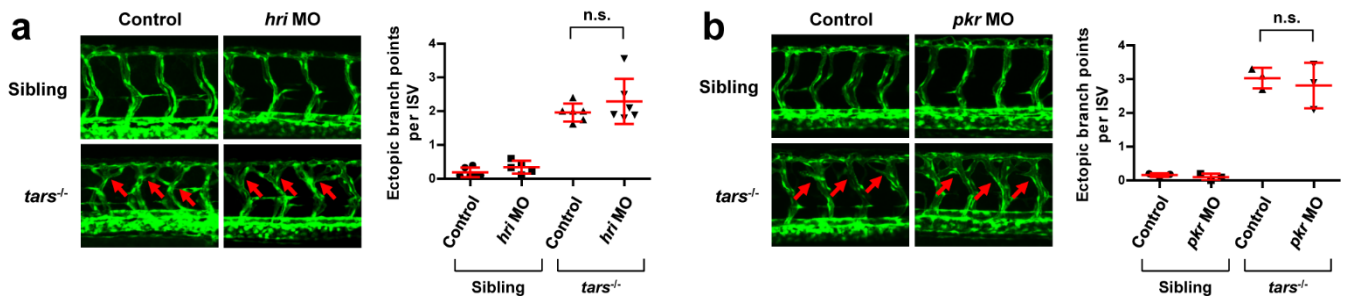

**Supplementary Fig. S7 Knockdown of two other eIF2 $\alpha$  kinases cannot rescue the angiogenic phenotypes in the *tars*<sup>-/-</sup> embryos. a, b** Confocal microscopy imaging of EGFP-labelled blood vessels in the trunk of the *tars*<sup>-/-</sup> and sibling zebrafish embryos that were treated with morpholino that leads to knockdown of Hri (*hri* MO) or Pkr (*pkc* MO). Quantification and statistical analysis of the ectopic branch points per intersomitic vessel (ISV) of the embryos are shown in the *right*.



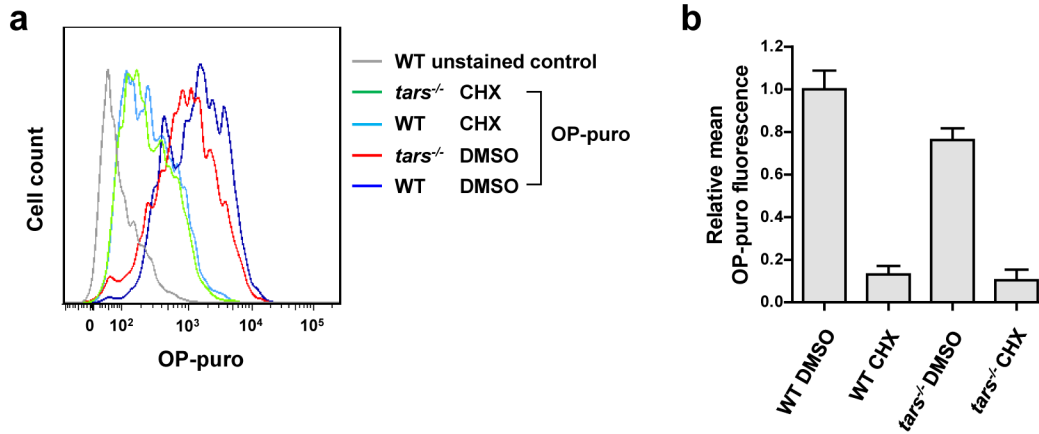

**Supplementary Fig. S8 OP-puro incorporation assay results showing the slight decrease of global protein translation level in the *tars*<sup>-/-</sup> embryos. **a** Representative histogram plots of the OP-puro incorporation assay measuring the OP-puro fluorescence of the cells of WT and *tars*<sup>-/-</sup> embryos with and without cycloheximide (CHX) treatment. The embryos treated with CHX were used as a positive control because CHX was known to inhibit protein translation. The concentration of CHX was 360  $\mu$ M. DMSO was used as solvent and was added into the control samples at the same final concentration. **b** Quantification of the relative mean OP-puro fluorescence values of the indicated samples. Data are presented as mean  $\pm$  SD of three measurements.**

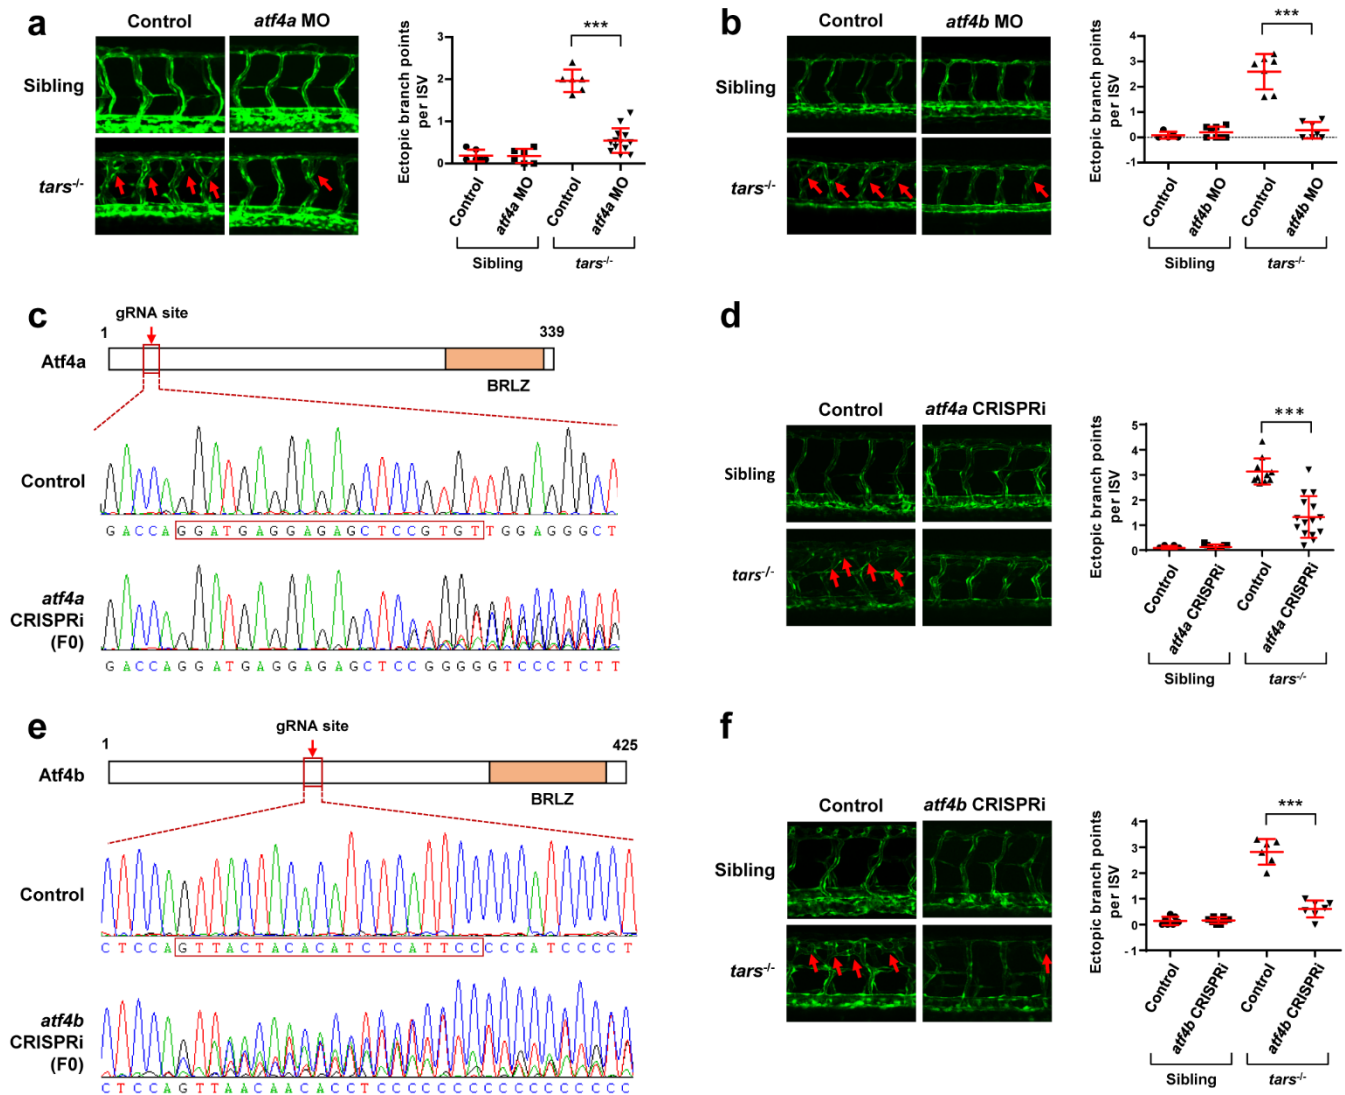

**Supplementary Fig. S9 Role of Atf4 in the *tars*-deficiency-induced angiogenesis. a, b** Morpholino-mediated knockdown of Atf4a (*atf4a* MO) and Atf4b (*atf4b* MO) significantly reduce the ectopic branch points of the blood vessels in the *tars*<sup>-/-</sup> embryos, indicative of a rescue of the angiogenic phenotypes. **c** CRISPR interference (CRISPRi) of Atf4a. The gRNA-targeting sequence (red box) is designed far upstream of the DNA-binding BRLZ (basic region leucine zipper) domain. The lower panel shows a sequencing result the F0 embryos, indicating efficient mutagenesis. **d** The CRISPRi of Atf4a significantly reduces the ectopic branch points of the blood vessels in the *tars*<sup>-/-</sup> embryos. **e, f** CRISPRi of Atf4b and its rescue of the angiogenic phenotypes. Data are presented as mean ± SD; \*\*\**P* < 0.001.

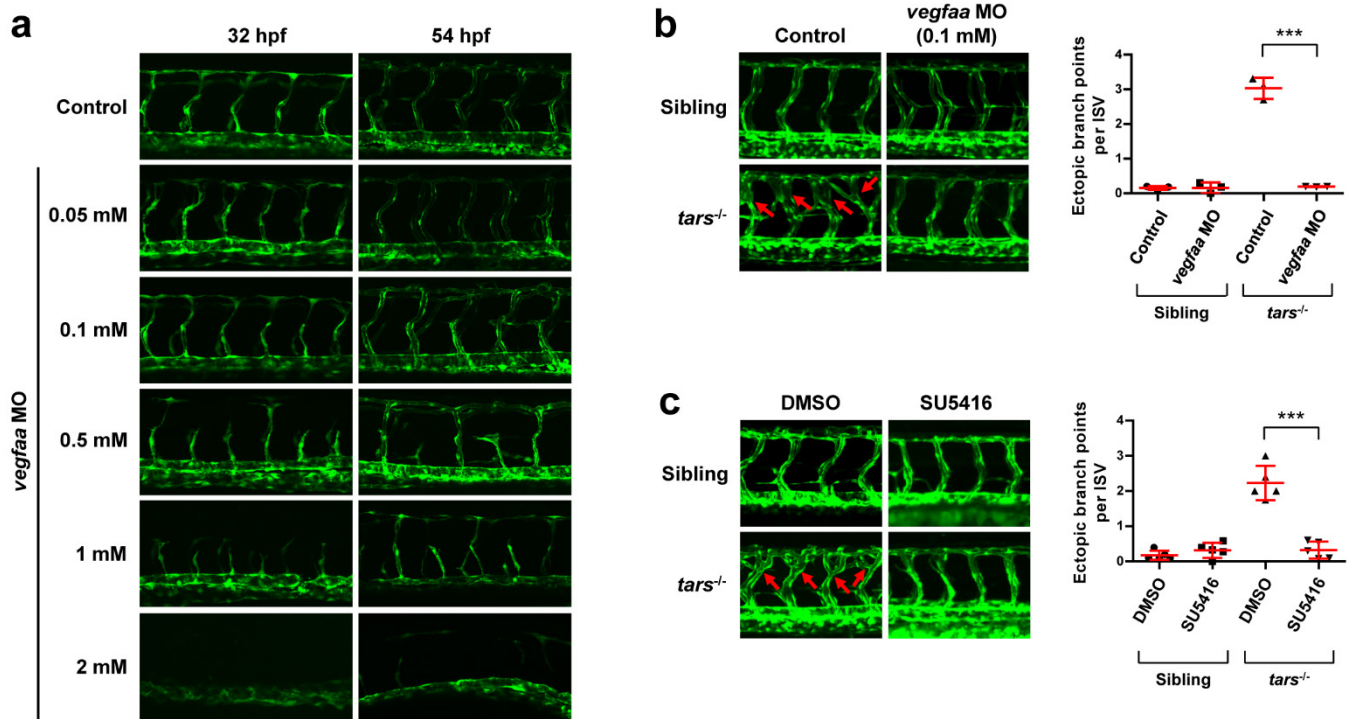

**Supplementary Fig. S10 Role of Vegfa in the *tars*-deficiency-induced angiogenesis.** **a** The *vegfaa* morpholino-injected embryos show a dosage-dependent inhibition of ISV growth, which phenocopies the previously reported *vegfaa* knockout line. **b** Injection of relatively lower dosage of *vegfaa* MO rescues the angiogenic phenotypes in the *tars*<sup>-/-</sup> embryos. **c** Pharmacological inhibition of Vegf receptor by SU5416 also significantly rescues the angiogenic phenotypes in the *tars*<sup>-/-</sup> embryos. Data are presented as mean ± SD; \*\*\**P* < 0.001.

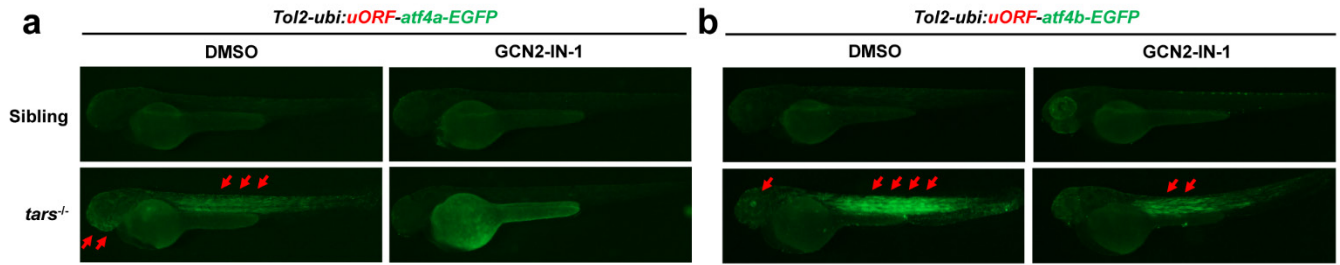

**Supplementary Fig. S11 The Gcn2 inhibitor GCN2-IN-1 suppresses the enhanced translation of the *atf4a*- and *atf4b*-EGFP fusion ORFs in the *tars*<sup>-/-</sup> embryos. a, b** Fluorescence microscope images showing that the enhanced translation levels of the *atf4a*- and *atf4b*-EGFP fusion ORFs in the trunk and head of *tars*<sup>-/-</sup> embryos (red arrows) were inhibited by GCN2-IN-1. The Tol2 transposase-based transgenic system containing a *ubiquitin* promoter (*ubi*:) was used to drive the expression of the reporters.

## Supplementary Tables

**Supplementary Table S1 The KRIGE\_AMINO\_ACID\_DEPRIVATION gene set, zebrafish orthologues and their expression levels (FPKM) in the embryos of indicated genotypes and treatments.**

| Human genes     | Zebrafish orthologues | Sibling  |                |                | <i>tars<sup>-/-</sup></i> |                |                |
|-----------------|-----------------------|----------|----------------|----------------|---------------------------|----------------|----------------|
|                 |                       | Control  | <i>gcn2</i> MO | <i>perk</i> MO | Control                   | <i>gcn2</i> MO | <i>perk</i> MO |
| <i>ASNS</i>     | <i>asns</i>           | 12.7778  | 13.499         | 17.4766        | 55.805                    | 22.0833        | 74.541         |
| <i>ASS1</i>     | <i>ass1**</i>         |          |                |                |                           |                |                |
| <i>ATF3</i>     | <i>atf3</i>           | 4.64294  | 2.67896        | 6.56419        | 26.8766                   | 9.33584        | 18.6064        |
| <i>ATF5</i>     | <i>atf5a</i>          | 6.8079   | 5.2392         | 16.1516        | 27.5749                   | 22.1082        | 41.73          |
|                 | <i>atf5b</i>          | 10.8794  | 8.53554        | 34.0625        | 67.6599                   | 52.4198        | 76.4682        |
| <i>CARS</i>     | <i>cars</i>           | 12.2941  | 11.1855        | 13.3785        | 27.5841                   | 16.6269        | 29.5621        |
| <i>CBS</i>      | <i>cbsb</i>           | 23.6708  | 33.608         | 44.1811        | 96.7335                   | 56.8833        | 143.436        |
|                 | <i>cbsa</i>           | 0.992865 | 1.18739        | 2.64271        | 0.918626                  | 1.49547        | 0.852058       |
| <i>CCNG2</i>    | <i>ccng2</i>          | 16.7789  | 12.6415        | 9.80828        | 17.0243                   | 11.6678        | 17.1183        |
| <i>CDKN1A</i>   | <i>cdkn1a</i>         | 2.17782  | 8.88066        | 56.9732        | 6.20042                   | 56.0636        | 13.6561        |
| <i>CEBPB</i>    | <i>cebpb</i>          | 36.2907  | 28.638         | 38.0368        | 81.1664                   | 42.9882        | 66.5645        |
| <i>CHAC1</i>    | <i>chac1</i>          | 132.022  | 87.945         | 118.068        | 616.506                   | 150.229        | 511.664        |
| <i>CLECTA</i>   | <i>n.a.</i>           |          |                |                |                           |                |                |
| <i>CTH</i>      | <i>cth</i>            | 13.5546  | 15.6478        | 16.2564        | 45.2045                   | 18.71          | 61.4893        |
|                 | <i>cthl*</i>          | 0.043517 | 0.077838       | 0.137926       | 0.087375                  | 0.20336        | 0.130401       |
| <i>DDIT3</i>    | <i>ddit3</i>          | 14.2811  | 6.61826        | 29.4444        | 47.8308                   | 42.9428        | 34.0392        |
| <i>DDIT4</i>    | <i>ddit4</i>          | 11.2316  | 5.46713        | 9.21389        | 21.0929                   | 8.60009        | 11.1535        |
| <i>FYN</i>      | <i>fynb</i>           | 5.25218  | 3.44139        | 3.79559        | 2.96999                   | 3.83948        | 3.84351        |
| <i>GADD45A</i>  | <i>gadd45ab</i>       | 5.90753  | 5.83784        | 9.31926        | 14.6411                   | 12.8189        | 11.4121        |
|                 | <i>gadd45aa</i>       | 2.92585  | 4.35368        | 9.83301        | 3.69133                   | 9.80174        | 4.854          |
| <i>IL8</i>      | <i>n.a.</i>           |          |                |                |                           |                |                |
| <i>MARS</i>     | <i>mars</i>           | 12.8249  | 15.1477        | 20.9553        | 32.6454                   | 24.3334        | 44.6962        |
| <i>PPP1R15A</i> | <i>ppp1r15a</i>       | 15.3882  | 9.32604        | 9.59315        | 27.0431                   | 11.2691        | 19.6778        |
| <i>PSAT1</i>    | <i>psat1</i>          | 45.2593  | 38.7016        | 42.9749        | 232.206                   | 66.5781        | 291.449        |
| <i>RETN</i>     | <i>n.a.</i>           |          |                |                |                           |                |                |
| <i>SARS</i>     | <i>sars</i>           | 31.9545  | 31.0109        | 30.1541        | 57.1626                   | 32.5118        | 59.4423        |
| <i>SESN2</i>    | <i>sesn2</i>          | 5.18575  | 3.13054        | 4.62645        | 48.8341                   | 8.63054        | 44.6323        |
| <i>SLC38A2</i>  | <i>slc38a2</i>        | 23.8182  | 9.44088        | 9.79865        | 46.0872                   | 14.8008        | 35.965         |
| <i>SLC7A11</i>  | <i>slc7a11*</i>       | 0.192269 | 0.219077       | 0.102542       | 0.610412                  | 0.263728       | 0.566294       |
| <i>STC2</i>     | <i>stc2a</i>          | 2.53331  | 2.59143        | 3.54231        | 33.7373                   | 6.63798        | 28.1475        |
| <i>TRIB3</i>    | <i>trib3</i>          | 28.67    | 18.4501        | 20.2941        | 103.988                   | 26.9422        | 86.237         |
|                 | <i>vegfaa</i>         | 4.40415  | 4.49817        | 5.32626        | 16.8601                   | 7.45147        | 16.0333        |
| <i>VEGFA</i>    | <i>vegfab</i>         | 3.77377  | 4.26537        | 3.86153        | 5.77992                   | 4.62035        | 5.72762        |
| <i>WARS</i>     | <i>wars</i>           | 19.7912  | 22.5991        | 25.0422        | 42.9704                   | 30.9267        | 50.2069        |

\* Zebrafish gene(s) that was not included in the cluster analysis because its expression level was low (FPKM < 1) and thus presented a low signal-to-noise ratio.

\*\* Zebrafish gene(s) that was absent from the analyzed version of ENSEMBL database.

n.a., not available; meaning that no zebrafish orthologue can be defined.

**Supplementary Table S2 The REACTOME\_PERK\_REGULATED\_GENE\_EXPRESSION gene set, zebrafish orthologues and their expression levels (FPKM) in the embryos of indicated genotypes and treatments.**

| Human genes      | Zebrafish orthologues | AAR-involved <sup>a</sup> | Reference (PMID) <sup>a</sup>    | Sibling |                |                | <i>tars<sup>-/-</sup></i> |                |                |
|------------------|-----------------------|---------------------------|----------------------------------|---------|----------------|----------------|---------------------------|----------------|----------------|
|                  |                       |                           |                                  | Control | <i>gcn2</i> MO | <i>perk</i> MO | Control                   | <i>gcn2</i> MO | <i>perk</i> MO |
| <i>ASNS</i>      | <i>asns</i>           | yes                       | Krige et al., 2008 <sup>1</sup>  | 12.7778 | 13.499         | 17.4766        | 55.805                    | 22.0833        | 74.541         |
| <i>ATF3</i>      | <i>atf3</i>           | yes                       | Krige et al., 2008 <sup>1</sup>  | 4.64294 | 2.67896        | 6.56419        | 26.8766                   | 9.33584        | 18.6064        |
| <i>ATF4</i>      | <i>atf4a</i>          | yes                       | Peng et al., 2002 <sup>2</sup>   | 169.367 | 148.676        | 214.045        | 282.497                   | 231.694        | 269.712        |
|                  | <i>atf4b</i>          | yes                       | Peng et al., 2002 <sup>2</sup>   | 152.721 | 107.125        | 312.962        | 375.903                   | 399.668        | 333.515        |
| <i>ATF4P3</i>    | <i>n.a.</i>           |                           |                                  |         |                |                |                           |                |                |
| <i>ATF6</i>      | <i>atf6</i>           |                           |                                  | 12.442  | 11.0678        | 10.9566        | 16.8622                   | 13.3997        | 22.8186        |
| <i>CCL2</i>      | <i>n.a.</i>           |                           |                                  |         |                |                |                           |                |                |
| <i>DCP2</i>      | <i>dcp2</i>           |                           |                                  | 13.3283 | 12.2076        | 10.0888        | 10.8556                   | 10.5474        | 11.1757        |
| <i>DDIT3</i>     | <i>ddit3</i>          | yes                       | Krige et al., 2008 <sup>1</sup>  | 14.2811 | 6.61826        | 29.4444        | 47.8308                   | 42.9428        | 34.0392        |
| <i>DIS3</i>      | <i>dis3</i>           |                           |                                  | 4.55522 | 5.60601        | 6.86919        | 3.83042                   | 6.67433        | 4.77681        |
| <i>EIF2AK3</i>   | <i>eif2ak3</i>        |                           |                                  | 10.2122 | 10.3506        | 8.52565        | 8.95028                   | 8.99864        | 10.6469        |
| <i>EIF2S1</i>    | <i>eif2s1a</i>        | yes                       | Peng et al., 2002 <sup>2</sup>   | 33.0029 | 34.4637        | 38.5197        | 30.9618                   | 33.8691        | 29.1565        |
|                  | <i>eif2s1b</i>        | yes                       | Peng et al., 2002 <sup>2</sup>   | 113.559 | 121.382        | 125.093        | 187.983                   | 132.115        | 192.38         |
| <i>EXOSC1</i>    | <i>exosc1</i>         |                           |                                  | 14.8726 | 12.008         | 16.3129        | 13.3179                   | 19.1027        | 13.8238        |
| <i>EXOSC2</i>    | <i>exosc2</i>         |                           |                                  | 14.9154 | 16.227         | 26.1832        | 16.3332                   | 24.628         | 15.958         |
| <i>EXOSC3</i>    | <i>exosc3</i>         |                           |                                  | 11.5068 | 13.6581        | 14.4402        | 8.85049                   | 11.8448        | 13.603         |
| <i>EXOSC4</i>    | <i>exosc4</i>         |                           |                                  | 21.0085 | 21.9783        | 32.7858        | 18.6403                   | 31.2613        | 15.2796        |
| <i>EXOSC5</i>    | <i>exosc5</i>         |                           |                                  | 11.9159 | 14.6059        | 24.4431        | 12.2122                   | 20.8276        | 11.7309        |
| <i>EXOSC6</i>    | <i>exosc6</i>         |                           |                                  | 28.6422 | 25.8924        | 40.9818        | 22.7782                   | 34.5389        | 14.8706        |
| <i>EXOSC7</i>    | <i>exosc7</i>         |                           |                                  | 11.242  | 13.394         | 19.1051        | 11.9156                   | 16.7994        | 10.7742        |
| <i>EXOSC8</i>    | <i>exosc8</i>         |                           |                                  | 8.30142 | 12.069         | 16.4971        | 8.32502                   | 14.577         | 9.51768        |
| <i>EXOSC9</i>    | <i>exosc9</i>         |                           |                                  | 8.54771 | 7.94716        | 10.4738        | 7.77676                   | 12.218         | 7.25746        |
| <i>HERPUD1</i>   | <i>herpud1</i>        |                           |                                  | 7.1064  | 6.15103        | 5.8655         | 11.3432                   | 6.48103        | 10.3902        |
| <i>HSPA5</i>     | <i>hspa5</i>          |                           |                                  | 156.992 | 164.491        | 112.251        | 124.906                   | 93.7419        | 114.531        |
| <i>IGFBP1</i>    | <i>igfbp1a</i>        | yes                       | Jousse et al., 1998 <sup>3</sup> | 14.5027 | 9.03908        | 22.674         | 153.898                   | 36.1958        | 159.483        |
|                  | <i>igfbp1b*</i>       |                           |                                  | 1.01003 | 0.855965       | 0.516334       | 0.85408                   | 0.280475       | 0.447482       |
| <i>IL8</i>       | <i>n.a.</i>           |                           |                                  |         |                |                |                           |                |                |
| <i>KHSRP</i>     | <i>khsrp</i>          |                           |                                  | 79.2965 | 85.0455        | 85.9661        | 67.376                    | 72.4118        | 71.8212        |
| <i>LOC730136</i> | <i>n.a.</i>           |                           |                                  |         |                |                |                           |                |                |
| <i>NFYA</i>      | <i>nfyal</i>          |                           |                                  | 4.22319 | 3.91737        | 4.03912        | 4.14596                   | 4.0228         | 4.39618        |
|                  | <i>nfya</i>           |                           |                                  | 33.5126 | 29.3149        | 28.0291        | 33.3274                   | 28.3857        | 33.9715        |
| <i>NFYB</i>      | <i>nfyba</i>          |                           |                                  | 58.4525 | 58.6865        | 39.0586        | 52.0811                   | 41.5343        | 52.4005        |
|                  | <i>nfybb</i>          |                           |                                  | 5.4887  | 5.70052        | 5.54155        | 5.03619                   | 5.53048        | 7.58983        |
| <i>PARN</i>      | <i>parn</i>           |                           |                                  | 25.4634 | 23.5101        | 22.6184        | 24.2401                   | 21.7613        | 20.856         |

<sup>a</sup> Some genes of this geneset is also involved in the AAR pathway, as described in the indicated reference.

\* Zebrafish gene(s) that was not included in the cluster analysis because its expression level was low (FPKM < 1) and thus presented a low signal-to-noise ratio.

n.a., not available; meaning that no zebrafish orthologue can be defined.

**Supplementary Table S3 The GO\_IRE1\_MEDIATED\_UNFOLDED\_PROTEIN\_RESPONSE gene set, zebrafish orthologues and their expression levels (FPKM) in the embryos of indicated genotypes and treatments.**

| Human genes     | Zebrafish orthologues   | Sibling |                |                | <i>tars<sup>-/-</sup></i> |                |                |
|-----------------|-------------------------|---------|----------------|----------------|---------------------------|----------------|----------------|
|                 |                         | Control | <i>gcn2</i> MO | <i>perk</i> MO | Control                   | <i>gcn2</i> MO | <i>perk</i> MO |
| <i>ACADVL</i>   | <i>acadvl</i>           | 27.4021 | 30.6963        | 22.1702        | 25.6829                   | 23.5006        | 28.9751        |
| <i>ADD1</i>     | <i>add1</i>             | 21.1272 | 18.3327        | 16.0684        | 13.9502                   | 18             | 16.1944        |
| <i>ARFGAP1</i>  | <i>CABZ01091853.1**</i> |         |                |                |                           |                |                |
| <i>ASNA1</i>    | <i>asna1</i>            | 14.7906 | 14.8294        | 16.4709        | 12.7717                   | 15.6203        | 12.5889        |
| <i>ATP6V0D1</i> | <i>atp6v0d1</i>         | 27.1458 | 23.7058        | 22.6956        | 23.3905                   | 22.5548        | 22.8995        |
| <i>C19orf10</i> | <i>mydgf</i>            | 19.4295 | 22.3921        | 19.7122        | 14.8827                   | 18.4382        | 17.9356        |
| <i>CTDSP2</i>   | <i>ctdsp2</i>           | 26.3171 | 31.2973        | 29.1188        | 33.4074                   | 33.4835        | 44.1033        |
| <i>CUL7</i>     | <i>n.a.</i>             |         |                |                |                           |                |                |
| <i>CXXC1</i>    | <i>cxxc1a</i>           | 6.86687 | 7.00419        | 5.65863        | 6.31773                   | 5.39455        | 6.27812        |
|                 | <i>cxxc1b</i>           | 9.16509 | 8.8912         | 7.36467        | 9.51463                   | 7.43676        | 7.05097        |
| <i>DCTN1</i>    | <i>dctn1b</i>           | 2.11174 | 1.64734        | 1.19003        | 1.83618                   | 1.35405        | 1.61869        |
| <i>DDX11</i>    | <i>ddx11</i>            | 2.4044  | 2.66523        | 3.56883        | 2.02473                   | 2.69864        | 2.75115        |
| <i>DNAJB11</i>  | <i>dnajb11</i>          | 20.13   | 19.5681        | 14.2497        | 14.8184                   | 12.6073        | 13.2893        |
| <i>DNAJB9</i>   | <i>dnajb9a</i>          | 4.5605  | 2.44719        | 1.87907        | 2.60458                   | 2.37793        | 2.61167        |
| <i>DNAJC3</i>   | <i>dnajc3a</i>          | 5.77002 | 6.40965        | 4.00289        | 5.17343                   | 2.82932        | 4.35697        |
| <i>EDEM1</i>    | <i>edem1</i>            | 8.88653 | 8.15055        | 7.61754        | 7.05475                   | 7.5346         | 6.59871        |
| <i>ERN1</i>     | <i>ern2</i>             | 1.01751 | 1.46251        | 1.66768        | 0.668838                  | 1.50827        | 1.27042        |
| <i>EXTL3</i>    | <i>extl3</i>            | 6.1502  | 5.13564        | 5.17431        | 3.67                      | 5.84246        | 4.24995        |
| <i>FKBP14</i>   | <i>fkbp14</i>           | 11.8696 | 14.4703        | 14.0084        | 10.3045                   | 14.7785        | 14.0823        |
| <i>GFPT1</i>    | <i>gfpt1</i>            | 14.1673 | 15.4687        | 16.374         | 11.3158                   | 16.562         | 15.5291        |
| <i>GOSR2</i>    | <i>gosr2</i>            | 16.0088 | 19.9361        | 15.1976        | 17.9523                   | 14.0263        | 16.4757        |
| <i>GSK3A</i>    | <i>gsk3ab</i>           | 34.0197 | 29.4933        | 30.5376        | 32.1645                   | 31.2777        | 28.2231        |
|                 | <i>gsk3aa</i>           | 5.7861  | 4.86854        | 4.43027        | 4.82346                   | 5.73406        | 4.41911        |
| <i>HDGF</i>     | <i>n.a.</i>             |         |                |                |                           |                |                |
| <i>HSPA5</i>    | <i>hspa5</i>            | 156.992 | 164.491        | 112.251        | 124.906                   | 93.7419        | 114.531        |
| <i>HYOU1</i>    | <i>hyou1</i>            | 19.1991 | 21.0289        | 17.2616        | 18.5432                   | 15.5348        | 22.0831        |
| <i>KDEL3</i>    | <i>kdelr3</i>           | 17.8931 | 25.0381        | 15.7992        | 15.2845                   | 15.2683        | 19.9886        |
| <i>KLHDC3</i>   | <i>klhdc3</i>           | 21.4452 | 23.9742        | 25.1428        | 24.9407                   | 23.975         | 22.6426        |
| <i>LMNA</i>     | <i>lmna</i>             | 4.78528 | 4.88764        | 6.62941        | 4.17122                   | 6.36784        | 5.75813        |
| <i>PDIA5</i>    | <i>pdia5</i>            | 13.3178 | 17.014         | 16.4621        | 11.3725                   | 17.5973        | 14.5372        |
| <i>PDIA6</i>    | <i>pdia6</i>            | 39.7802 | 50.748         | 31.9132        | 25.4756                   | 26.9681        | 33.4494        |
| <i>PLA2G4B</i>  | <i>n.a.</i>             |         |                |                |                           |                |                |
| <i>PPP2R5B</i>  | <i>PPP2R5B</i>          | 4.57614 | 3.0562         | 2.54514        | 4.18589                   | 2.11948        | 2.39568        |
| <i>PREB</i>     | <i>preb</i>             | 10.0795 | 12.0888        | 13.945         | 11.5267                   | 13.3328        | 11.3745        |
| <i>PTPN1</i>    | <i>ptpn1</i>            | 17.7697 | 14.3358        | 18.5679        | 17.4036                   | 19.4374        | 15.3843        |
| <i>SEC31A</i>   | <i>sec31a</i>           | 7.93099 | 9.80757        | 8.07053        | 6.4381                    | 7.96626        | 8.91037        |
| <i>SEC61A1</i>  | <i>sec61a1l</i>         | 16.3911 | 18.6649        | 15.1938        | 14.6405                   | 14.2771        | 14.2597        |
|                 | <i>sec61a1</i>          | 81.7947 | 86.3473        | 71.2337        | 77.6719                   | 66.6339        | 82.545         |
| <i>SEC61A2</i>  | <i>n.a.</i>             |         |                |                |                           |                |                |
| <i>SEC61B</i>   | <i>sec61b</i>           | 66.2475 | 70.2424        | 60.0764        | 69.2136                   | 57.2728        | 66.8648        |
| <i>SEC61G</i>   | <i>sec61g</i>           | 115.504 | 139.127        | 111.67         | 124.96                    | 104.519        | 128.034        |



|                |               |          |          |          |          |          |         |
|----------------|---------------|----------|----------|----------|----------|----------|---------|
| <i>SEC62</i>   | <i>sec62</i>  | 21.0845  | 17.6026  | 18.3897  | 18.9085  | 19.6056  | 13.8231 |
| <i>SEC63</i>   | <i>sec63</i>  | 14.6637  | 13.2114  | 11.6047  | 11.8096  | 12.753   | 11.8492 |
| <i>SERP1</i>   | <i>serp1</i>  | 88.7814  | 94.0731  | 91.2115  | 89.5904  | 89.5481  | 93.4526 |
| <i>SHC1</i>    | <i>shc1</i>   | 15.7794  | 14.4935  | 12.9485  | 13.2657  | 13.4146  | 14.2615 |
| <i>SRPR</i>    | <i>srpr</i>   | 21.8308  | 19.0865  | 18.5546  | 21.79    | 18.0502  | 23.8366 |
| <i>SRPRB</i>   | <i>srprb</i>  | 16.617   | 20.1562  | 28.3389  | 18.1783  | 23.4701  | 19.6338 |
| <i>SSR1</i>    | <i>ssr1</i>   | 112.396  | 139.154  | 125.824  | 115.889  | 115.749  | 120.108 |
| <i>SULT1A3</i> | <i>n.a.</i>   |          |          |          |          |          |         |
| <i>SYVN1</i>   | <i>syvn1</i>  | 13.809   | 12.4166  | 11.8996  | 13.1871  | 9.72484  | 11.3123 |
| <i>TATDN2</i>  | <i>tatdn2</i> | 0.186181 | 0.145696 | 0.159818 | 0.062303 | 0.114479 | 0.05424 |
| <i>TLN1</i>    | <i>tln1</i>   | 14.2165  | 14.3997  | 14.9725  | 12.5663  | 16.0774  | 14.8673 |
| <i>TPP1</i>    | <i>tpp1</i>   | 12.7414  | 12.2376  | 13.4584  | 11.4731  | 13.1779  | 12.0034 |
| <i>TSPYL2</i>  | <i>n.a.</i>   |          |          |          |          |          |         |
| <i>WFS1</i>    | <i>wfs1b</i>  | 1.51104  | 1.07594  | 1.754    | 1.39027  | 1.36112  | 1.33786 |
| <i>WIP1</i>    | <i>wipi1</i>  | 12.58    | 15.1905  | 10.4325  | 20.3661  | 13.6742  | 29.4787 |
| <i>XBP1</i>    | <i>xbp1</i>   | 123.694  | 126.274  | 114.142  | 244.094  | 127.903  | 253.031 |
| <i>YIF1A</i>   | <i>yif1a</i>  | 11.6937  | 15.5337  | 16.1823  | 11.3265  | 16.5869  | 13.5465 |
| <i>ZBTB17</i>  | <i>zbtb17</i> | 11.2168  | 5.6836   | 9.70476  | 10.3418  | 11.5698  | 6.66083 |

\*\* Zebrafish gene(s) that was absent from the analyzed version of ENSEMBL database.

n.a., not available; meaning that no zebrafish orthologue can be defined.

**Supplementary Table S4 The REACTOME\_ACTIVATION\_OF\_CHAPERONES\_BY\_ATF6\_ALPHA gene set, zebrafish orthologues and their expression levels (FPKM) in the embryos of indicated genotypes and treatments.**

| Human genes      | Zebrafish orthologues | AAR-involved <sup>a</sup> | Reference (PMID) <sup>a</sup>   | Sibling |                |                | <i>tars</i> <sup>-/-</sup> |                |                |
|------------------|-----------------------|---------------------------|---------------------------------|---------|----------------|----------------|----------------------------|----------------|----------------|
|                  |                       |                           |                                 | Control | <i>gcn2</i> MO | <i>perk</i> MO | Control                    | <i>gcn2</i> MO | <i>perk</i> MO |
| <i>ATF4</i>      | <i>atf4a</i>          | yes                       | Peng et al., 2002 <sup>2</sup>  | 169.37  | 148.68         | 214.05         | 282.5                      | 231.69         | 269.71         |
|                  | <i>atf4b</i>          | yes                       | Peng et al., 2002 <sup>2</sup>  | 152.72  | 107.13         | 312.96         | 375.9                      | 399.67         | 333.52         |
| <i>ATF4P3</i>    | <i>n.a.</i>           |                           |                                 |         |                |                |                            |                |                |
| <i>ATF6</i>      | <i>atf6</i>           |                           |                                 | 12.442  | 11.068         | 10.957         | 16.862                     | 13.4           | 22.819         |
| <i>CALR</i>      | <i>calr</i>           |                           |                                 | 36.552  | 43.123         | 21.445         | 26.845                     | 18.807         | 30.425         |
| <i>DDIT3</i>     | <i>ddit3</i>          | yes                       | Krige et al., 2008 <sup>1</sup> | 14.281  | 6.6183         | 29.444         | 47.831                     | 42.943         | 34.039         |
| <i>HSP90B1</i>   | <i>hsp90b1</i>        |                           |                                 | 60.349  | 76.837         | 38.669         | 42.559                     | 33.541         | 45.17          |
| <i>HSPA5</i>     | <i>hspa5</i>          |                           |                                 | 156.99  | 164.49         | 112.25         | 124.91                     | 93.742         | 114.53         |
| <i>LOC730136</i> | <i>n.a.</i>           |                           |                                 |         |                |                |                            |                |                |
| <i>MBTPS1</i>    | <i>mbtps1</i>         |                           |                                 | 10.578  | 11.785         | 10.573         | 9.9886                     | 10.945         | 11.714         |
| <i>MBTPS2</i>    | <i>mbtps2</i>         |                           |                                 | 4.9965  | 5.2869         | 5.3737         | 4.5296                     | 4.8088         | 5.2161         |
| <i>NFYA</i>      | <i>nfyal</i>          |                           |                                 | 4.2232  | 3.9174         | 4.0391         | 4.146                      | 4.0228         | 4.3962         |
|                  | <i>nfya</i>           |                           |                                 | 33.513  | 29.315         | 28.029         | 33.327                     | 28.386         | 33.972         |
| <i>NFYB</i>      | <i>nfyba</i>          |                           |                                 | 58.453  | 58.687         | 39.059         | 52.081                     | 41.534         | 52.401         |
|                  | <i>nfybb</i>          |                           |                                 | 5.4887  | 5.7005         | 5.5416         | 5.0362                     | 5.5305         | 7.5898         |
| <i>XBP1</i>      | <i>xbp1</i>           |                           |                                 | 123.69  | 126.27         | 114.14         | 244.09                     | 127.9          | 253.03         |

<sup>a</sup> Some genes of this geneset is also involved in the AAR pathway, as described in the indicated reference.

*n.a.*, not available; meaning that no zebrafish orthologue can be defined.

**Supplementary Table S5 Sequences of the oligonucleotides used in this study.**

| oligonucleotide                             | Sequence                     | Source                               |
|---------------------------------------------|------------------------------|--------------------------------------|
| <b>Primers for genotyping</b>               |                              |                                      |
| <i>tars</i> -genotyping-for                 | ATTTGAAGCTGACAGGGA           |                                      |
| <i>tars</i> -genotyping-rev                 | ACCGAAGTAATGAGAAGGAT         |                                      |
| <i>gcn2</i> -genotyping-for                 | ACTGTGGTGACACAAGCAAAG        |                                      |
| <i>gcn2</i> -genotyping-rev                 | CCGACTCACTCCTCCAAAAC         |                                      |
| <i>perk</i> -genotyping-for                 | AACACTGCTTTATTTGCACATCT      |                                      |
| <i>perk</i> -genotyping-rev                 | TAAGGAAATGGGTGGTCTCG         |                                      |
| <b>Primers for RT-qPCR</b>                  |                              |                                      |
| Zebrafish- <i>atf3</i> -for                 | CTGTCCCAGAGGAGAACGAC         |                                      |
| Zebrafish- <i>atf3</i> -rev                 | GCTCTGCATTGATGGACTCA         |                                      |
| Zebrafish- <i>atf4a</i> -for                | CTTTCTCTCCTCCTGCTTCT         |                                      |
| Zebrafish- <i>atf4a</i> -rev                | GAGTCACACGACCCAATCA          |                                      |
| Zebrafish- <i>vegfaa</i> -for               | AAAAGAGTGCGTGCAAGACC         |                                      |
| Zebrafish- <i>vegfaa</i> -rev               | GACGTTTCGTGTCTCTGTCCG        |                                      |
| Zebrafish- <i>asns</i> -for                 | TGCCTTCTCTCAGGTGGTCT         |                                      |
| Zebrafish- <i>asns</i> -rev                 | CATCTGGACTGTCTCAGCA          |                                      |
| Zebrafish- <i>cars</i> -for                 | TCAGTGCTGTCCGATTTCCAG        |                                      |
| Zebrafish- <i>cars</i> -rev                 | ACCCCCAGCTCAGGTAAAGT         |                                      |
| Zebrafish- <i>sars</i> -for                 | GTGGCTGAAGCCAGAAGAAC         |                                      |
| Zebrafish- <i>sars</i> -rev                 | GGCGTACACAAACTGCTCAA         |                                      |
| Zebrafish- <i>mars</i> -for                 | GCTGAAGTGCATCCTCAACA         |                                      |
| Zebrafish- <i>mars</i> -rev                 | GCCACATTCAGTACACACACC        |                                      |
| Zebrafish- $\beta$ - <i>actin</i> -for      | TGCTGTTTTCCCCTCCATTG         |                                      |
| Zebrafish- $\beta$ - <i>actin</i> -rev      | TTCTGTCCCATGCCAACCA          |                                      |
| <b>Morpholino oligonucleotides (MOs)</b>    |                              |                                      |
| <i>tars</i> MO                              | GATCAGTCACACTCTCATCCGCCAT    | Castranova et al., 2016 <sup>4</sup> |
| <i>gcn2</i> MO                              | TCATCCTTCATTCATCTTTCTTCGT    | This paper                           |
| <i>perk</i> MO                              | ACTGAAACCCCTTTCCATTGGGAC     | Jia et al., 2015 <sup>5</sup>        |
| <i>hri</i> MO                               | CTCCGTATCTGTGAGGCTGAACATT    | This paper                           |
| <i>pkr</i> MO                               | TTTCCTGACAGAGACTCCATTGCGA    | This paper                           |
| <i>eif2s1a</i> MO                           | CTGGCATCTTACCCGATATGTAGG     | This paper                           |
| <i>eif2s1b</i> MO                           | AAAACCGACAGCTCAGACCCGGCAT    | This paper                           |
| <i>atf4a</i> MO                             | CAGCGTCCCCAACACAGAGACAT      | Castranova et al., 2016 <sup>4</sup> |
| <i>atf4b</i> MO                             | CATGGCTGTCTATTTCAAGTGAAT     | This paper                           |
| <i>vegfaa</i> MO                            | TAAGAAAGCGAAGCTGCTGGGTATG    | Nasevicius et al., 2000 <sup>6</sup> |
| <b>DIG-labeled probes for Northern Blot</b> |                              |                                      |
| Zebrafish-tRNA <sup>Thr</sup> (UGU)         | CCCAGCGAGGATCGAACTCGCGCCCCTG | This paper                           |
| Zebrafish-tRNA <sup>Thr</sup> (AGU/CGU)     | CTTTACCAACTAAGCCACA          | This paper                           |
| Zebrafish-tRNA <sup>Gly</sup> GCC           | CGCGTGGCAGGCGAGAATTC         | This paper                           |
| Zebrafish-5S rRNA                           | GCAACCTAGTTTTCCATGTGGTCTCCAT | This paper                           |

## Supplementary References

- 1 Krige, D. *et al.* CHR-2797: an antiproliferative aminopeptidase inhibitor that leads to amino acid deprivation in human leukemic cells. *Cancer Res* **68**, 6669-6679 (2008).
- 2 Peng, T., Golub, T. R. & Sabatini, D. M. The immunosuppressant rapamycin mimics a starvation-like signal distinct from amino acid and glucose deprivation. *Mol Cell Biol* **22**, 5575-5584 (2002).
- 3 Jousse, C., Bruhat, A., Ferrara, M. & Fafournoux, P. Physiological concentration of amino acids regulates insulin-like-growth-factor-binding protein 1 expression. *Biochem J* **334**, 147-153 (1998).
- 4 Castranova, D. *et al.* Aminoacyl-Transfer RNA Synthetase Deficiency Promotes Angiogenesis via the Unfolded Protein Response Pathway. *Arterioscler Thromb Vasc Biol* **36**, 655-662 (2016).
- 5 Jia, X. E. *et al.* Mutation of kri1l causes definitive hematopoiesis failure via PERK-dependent excessive autophagy induction. *Cell Res* **25**, 946-962 (2015).
- 6 Nasevicius, A., Larson, J. & Ekker, S. C. Distinct requirements for zebrafish angiogenesis revealed by a VEGF-A morphant. *Yeast* **17**, 294-301 (2000).
